# Supplementary material for: Co-cultivation of Synechocystis salina and Pseudokirchneriella subcapitata under varying phosphorus concentrations evidences an allelopathic competition scenario
Source: Royal Society of Chemistry journal article supplement (doi:10.1039/c6ra07771d), 2016-01-01
Supplement: c6ra07771d1.pdf [file c6ra07771d1.pdf]

### ESI – File S1: Modified Gompertz model development

Microalgal and bacterial growth curves are similar, showing an exponential growth phase. Plotting biomass concentration,  $X$ , as function of time,  $t$ , results in a growth curve where three different growth phases can be distinguished. These growth phases can be described by the following parameters: (i) the lag time,  $\lambda$ , defined as the  $x$ -axis intercept of this tangent; (ii) the maximum specific growth rate,  $\mu_{max}$ , defined as the tangent in the inflection point; and (iii) the highest biomass concentration achieved or upper asymptote, normally occurring when the stationary growth phase is reached,  $A$ . To establish the growth model, the Gompertz equation represented in Equation 3 was rewritten to include the above described growth parameters.

The inflection point of the curve was obtained by calculating the second derivative of the function with respect to  $t$ :

$$\frac{dy}{dt} = ac \cdot \exp[-\exp(b - ct)] \cdot \exp(b - ct) \quad (\text{S1.1})$$

$$\frac{d^2y}{dt^2} = ac^2 \cdot \exp[-\exp(b - ct)] \cdot \exp(b - ct) \cdot [\exp(b - ct) - 1] \quad (\text{S1.2})$$

At the inflection point,  $t = t_i$ , the second derivative is equal to 0:

$$\frac{d^2y}{dt^2} = 0 \rightarrow b - ct_i = 0 \leftrightarrow t_i = \frac{b}{c} \quad (\text{S1.3})$$

$$y_i = a \cdot \exp[-\exp(0)] = a \cdot \exp(-1) = \frac{a}{e} \quad (\text{S1.4})$$

where  $y_i$  corresponds to the output value at time  $t = t_i$ .

Maximum specific growth rate was then determined by calculating the first derivative at the inflection point:

$$\left(\frac{dy}{dt}\right)_{t_i} = \mu_{max} y_i \leftrightarrow \frac{ac}{e} = \mu_{max} \frac{a}{e} \leftrightarrow \mu_{max} = c \quad (S1.5)$$

Knowing the point  $(t_i, y_i)$  and the slope,  $m = \left(\frac{dy}{dt}\right)_{t_i} = \mu_{max} y_i$ , the tangent line through the inflection point can be written as:

$$y = \mu_{max} \frac{a}{e} t + \frac{a}{e} (1 - \mu_{max} t_i) \quad (S1.6)$$

The lag time,  $\lambda$ , is defined as the  $t$ -axis intercept of the tangent through the inflection point:

$$0 = \mu_{max} \frac{a}{e} \lambda + \frac{a}{e} (1 - \mu_{max} t_i) \quad (S1.7)$$

Using Equations S1.3, S1.5 and S1.7, the lag time corresponds to:

$$\lambda = \frac{b-1}{c} \quad (S1.8)$$

By substituting the parameters  $a$ ,  $b$  and  $c$  from the Gompertz equation, the modified Gompertz model was obtained:

$$X = A \cdot \exp[-\exp(\mu_{max}(\lambda - t) + 1)] \quad (S1.9)$$

**ESI – File S2:** Performance indexes of the model fits

The quality of the model fits was evaluated by calculating the following performance indexes:

(i) Root mean squared error ( $RMSE$ ) measures the agreement between data obtained empirically and predicted values. The null value for this performance parameter indicates a perfect fit between predicted and experimental data.

$$RMSE = \sqrt{\frac{\sum (z - \hat{z})^2}{n}} \quad (S2.1)$$

where  $z$  denotes the experimental values,  $\hat{z}$  the predicted values by the model and  $n$  the data size.

(ii) Standard error of prediction ( $\%SEP$ ) corresponds to standardized  $RMSE$ . A  $\%SEP$  of zero also denotes a perfect fit between predicted and experimental data.

$$\%SEP = \frac{100}{\bar{z}} \sqrt{\frac{\sum (z - \hat{z})^2}{n}} \quad (S2.2)$$

where  $\bar{z}$  denotes the mean of the experimental values.

(iii) Bias factor ( $B_f$ ) is an objective indicator of model performance, since the perfect fit is determined by a  $B_f$  of one.

$$B_f = 10^{\frac{\log \sum \log(\hat{z}/z)}{n}} \quad (S2.3)$$

(iv) Accuracy factor ( $A_f$ ) represents the difference between the mean observed values and the predicted ones. An  $A_f$  of one also denotes a perfect fit between predicted and experimental data. An increase in this factor results in a low capacity of the model to simulate empirical data.

$$A_f = 10^{\frac{\sum |\log(\hat{z}/z)|}{n}} \quad (\text{S2.4})$$

ESI – File S3: Growth curves

Growth curves obtained for mono- and co-cultures of *S. salina* and *P. subcapitata* grown under varying phosphate-phosphorus concentrations are shown in Figure 3.1.

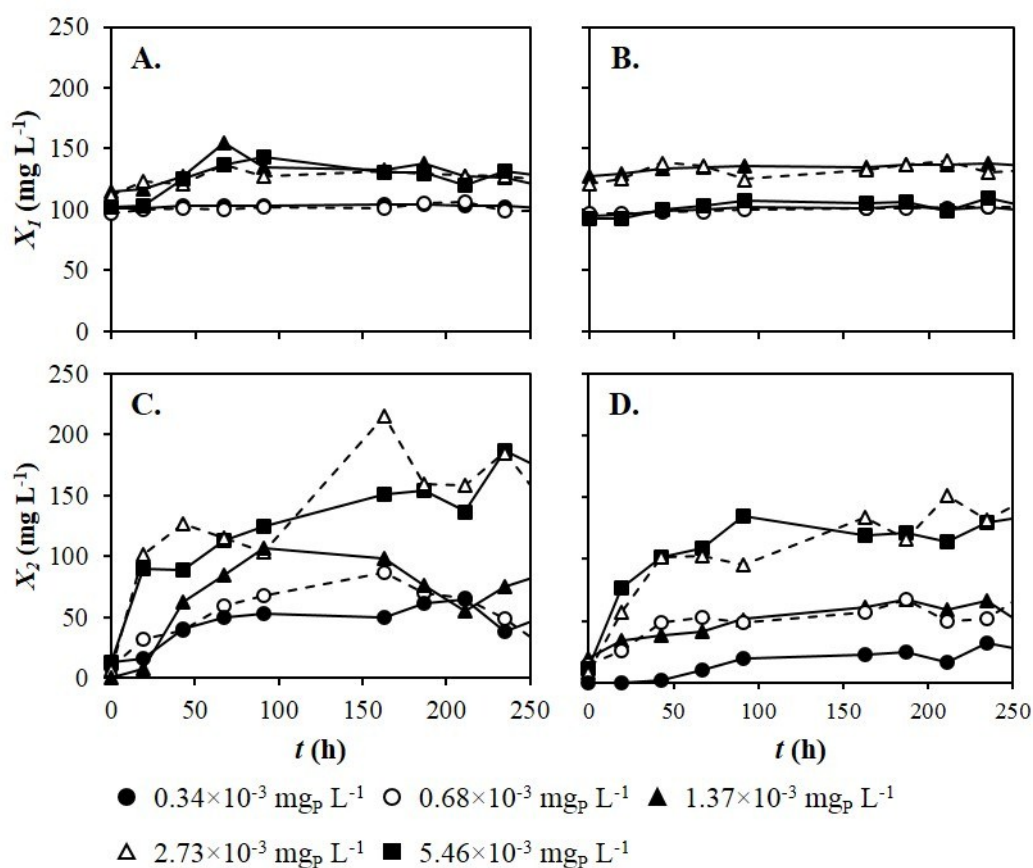

**Figure S3.1.** Growth curves of mono- and co-cultures of *S. salina* and *P. subcapitata* grown under varying phosphorus concentrations: A. *S. salina* grown in mono-cultures; B. *S. salina* grown in co-cultures; C. *P. subcapitata* grown in mono-cultures; D. *P. subcapitata* grown in co-cultures.

**ESI – File S4:** GC-MS and 1D-NMR analysis

The compounds identified by GC-MS with a percentage of similarity with NIST library higher than 80% are listed in Table S4.1. The organic acids used in antimicrobial studies are highlighted in bold.

**Table S4.1.** Compounds identified in co-cultures medium of *S. salina* and *P. subcapitata* by gas chromatography coupled with electron ionization mass spectrometry (GC-MS)

| Compound                                   | Molecular formula*                                              | Molecular weight* | % Similarity** |
|--------------------------------------------|-----------------------------------------------------------------|-------------------|----------------|
| 1 2,2,2-Trifluoroacetamide                 | C <sub>8</sub> H <sub>18</sub> F <sub>3</sub> NOSi <sub>2</sub> | 257               | 81             |
| 2 Octamethyltrisiloxane                    | C <sub>8</sub> H <sub>24</sub> O <sub>2</sub> Si <sub>3</sub>   | 236               | 91             |
| 3 <i>N</i> - <i>tert</i> -Butylmethylamine | C <sub>7</sub> H <sub>21</sub> NSi <sub>2</sub>                 | 175               | 91             |
| 4 Piperidine                               | C <sub>8</sub> H <sub>19</sub> NSi                              | 157               | 87             |
| <b>5 2-Hydroxypropanoic acid</b>           | <b>C<sub>9</sub>H<sub>22</sub>O<sub>3</sub>Si<sub>2</sub></b>   | <b>234</b>        | <b>91</b>      |
| 6 Alanine                                  | C <sub>9</sub> H <sub>23</sub> NO <sub>2</sub> Si <sub>2</sub>  | 233               | 90             |
| 7 Glycine                                  | C <sub>8</sub> H <sub>21</sub> NO <sub>2</sub> Si <sub>2</sub>  | 219               | 80             |
| 8 Dodecamethylpentasiloxane                | C <sub>12</sub> H <sub>36</sub> O <sub>4</sub> Si <sub>5</sub>  | 384               | 90             |
| 9 L-Valine                                 | C <sub>11</sub> H <sub>27</sub> NO <sub>2</sub> Si <sub>2</sub> | 261               | 86             |
| 10 Urea                                    | C <sub>7</sub> H <sub>20</sub> N <sub>2</sub> OSi <sub>2</sub>  | 204               | 95             |
| 11 Aminoethanol                            | C <sub>11</sub> H <sub>31</sub> NOSi <sub>3</sub>               | 277               | 99             |
| 12 Glycerol                                | C <sub>12</sub> H <sub>32</sub> O <sub>3</sub> Si <sub>3</sub>  | 308               | 91             |
| 13 L-Isoleucine                            | C <sub>12</sub> H <sub>29</sub> NO <sub>2</sub> Si <sub>2</sub> | 275               | 90             |
| 14 L-Proline                               | C <sub>11</sub> H <sub>25</sub> NO <sub>2</sub> Si <sub>2</sub> | 259               | 91             |
| 15 Glycine,                                | C <sub>11</sub> H <sub>29</sub> NO <sub>2</sub> Si <sub>3</sub> | 291               | 83             |
| <b>16 Butanedioic acid</b>                 | <b>C<sub>10</sub>H<sub>22</sub>O<sub>4</sub>Si<sub>2</sub></b>  | <b>262</b>        | <b>87</b>      |
| 17 Serine                                  | C <sub>12</sub> H <sub>31</sub> NO <sub>3</sub> Si <sub>3</sub> | 321               | 91             |

|    |                 |                        |     |    |
|----|-----------------|------------------------|-----|----|
| 18 | L-threonine     | $C_{13}H_{33}NO_3Si_3$ | 335 | 91 |
| 19 | Butane          | $C_{16}H_{42}O_4Si_4$  | 410 | 86 |
| 20 | L-Aspartic acid | $C_{13}H_{31}NO_4Si_3$ | 349 | 96 |

\* Characterized as silane derivatives

\*\* Percentage of similarity with NIST library.

**Table S4.1.** (continued)

| <b>Compound</b>                         | <b>Molecular formula*</b>                | <b>Molecular weight*</b> | <b>% Similarity**</b> |
|-----------------------------------------|------------------------------------------|--------------------------|-----------------------|
| <b>21 4-Aminobutanoic acid</b>          | <b><math>C_{13}H_{33}NO_2Si_3</math></b> | <b>319</b>               | <b>86</b>             |
| <b>22 2,3,4-Trihydroxybutanoic acid</b> | <b><math>C_{16}H_{40}O_5Si_4</math></b>  | <b>424</b>               | <b>95</b>             |
| 23 Ornithine                            | $C_{14}H_{36}N_2O_2Si_3$                 | 348                      | 99                    |
| 24 Glutamine                            | $C_{14}H_{33}NO_4Si_3$                   | 363                      | 99                    |
| 25 Phenylalanine                        | $C_{15}H_{27}NO_2Si_2$                   | 309                      | 91                    |
| 26 Arabinopyranose                      | $C_{17}H_{42}O_5Si_4$                    | 438                      | 94                    |
| 27 Arabinose                            | $C_{17}H_{42}O_5Si_4$                    | 438                      | 94                    |
| 28 L-Asparagine,                        | $C_{13}H_{32}N_2O_3Si_3$                 | 348                      | 99                    |
| 29 l-(-)-Arabitol                       | $C_{20}H_{52}O_5Si_5$                    | 512                      | 93                    |
| 30 D-Galactose,                         | $C_{21}H_{52}O_6Si_5$                    | 540                      | 83                    |
| 31 $\alpha$ -D-Mannopyranose            | $C_{21}H_{52}O_6Si_5$                    | 540                      | 93                    |
| 32 Talose                               | $C_{21}H_{52}O_6Si_5$                    | 540                      | 94                    |
| 33 L-Tyrosine                           | $C_{18}H_{35}NO_3Si_3$                   | 397                      | 91                    |
| 34 L-Lysine                             | $C_{18}H_{46}N_2O_2Si_4$                 | 434                      | 94                    |
| 35 D-Glucose                            | $C_{21}H_{52}O_6Si_5$                    | 540                      | 94                    |
| 36 Myo-Inositol                         | $C_{24}H_{60}O_6Si_6$                    | 612                      | 99                    |
| 37 $\beta$ -D-Galactofuranose           | $C_{21}H_{52}O_6Si_5$                    | 540                      | 80                    |
| 38 D-Mannopyranose                      | $C_{21}H_{52}O_6Si_5$                    | 540                      | 80                    |
| 39 $\beta$ -D-Galactofuranose           | $C_{21}H_{52}O_6Si_5$                    | 540                      | 91                    |
| 40 $\alpha$ -D-Glucopyranoside          | $C_{36}H_{86}O_{11}Si_8$                 | 918                      | 94                    |

\* Characterized as silane derivatives

\*\* Percentage of similarity with NIST library.

In Figure S4.1 the 1D-NMR spectrum of the co-cultures of *S. salina* and *P. subcapitata* medium where several organic compounds (amino acids, organic acids and alcohols) were identified is shown.

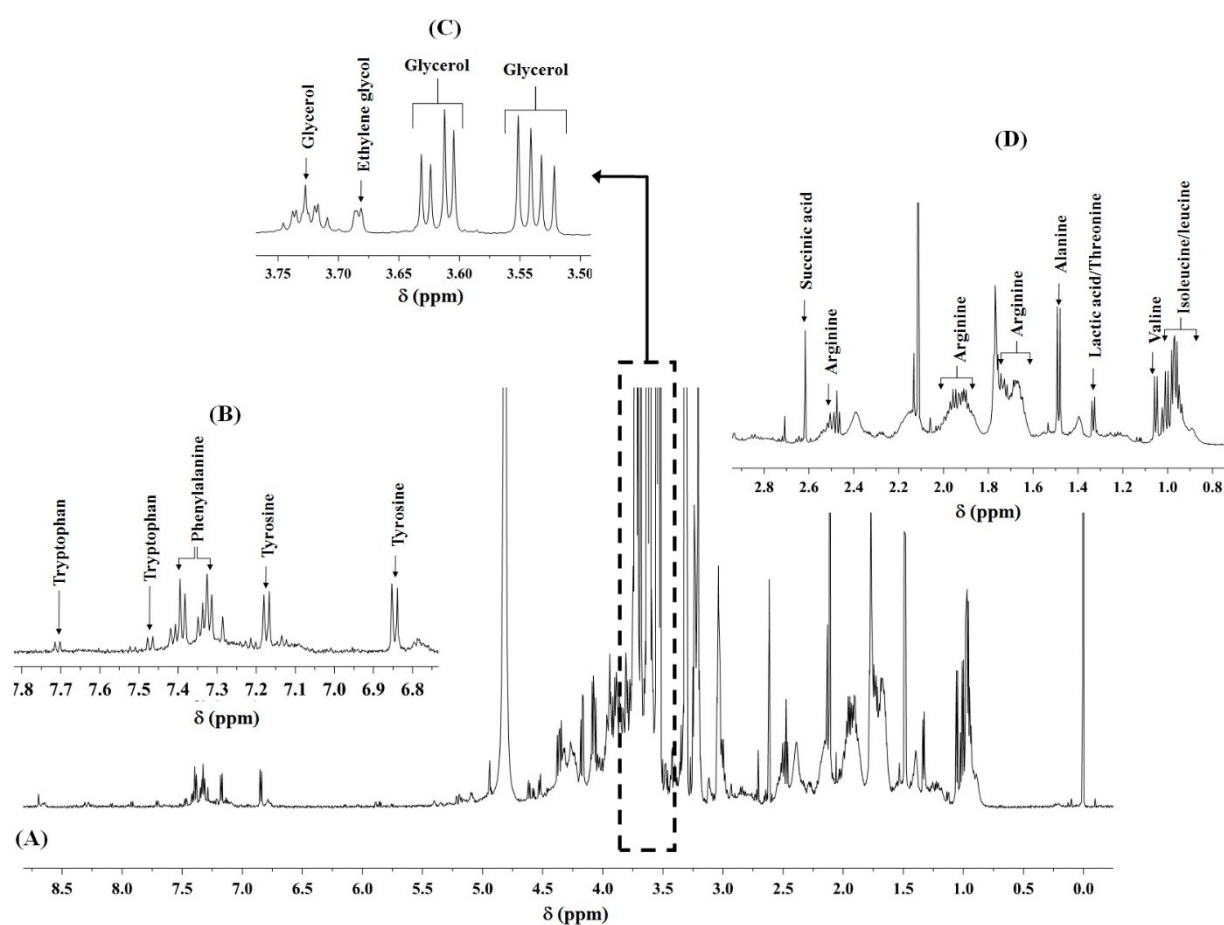

**Figure S4.1.** <sup>1</sup>H NMR spectrum (A) of the co-cultures medium of *Synechocystis salina* and *Pseudokirchneriella subcapitata* showing expanded spectrum: (B) from 6.8 to 7.8 ppm; (C) from 3.50 to 3.75ppm; and (D) from 0.8 to 2.8 ppm.



**ESI – File S5:** Disc diffusion method

Figure S5.1 shows the results of the disc diffusion method applied to evaluate the potential of 2-hydroxypropanoic acid (5), 1,4-butanedioic acid (16), 4-aminobutanoic acid (21) and 2,3,4-trihydroxybutanoic acid (22) against *S. salina* and *P. subcapitata*. From this figure, it is possible to see that 2-hydroxypropanoic acid presented an inhibitory effect towards *S. salina*, but not towards *P. subcapitata*. The other studied compounds have not shown activity against the studied microorganisms.

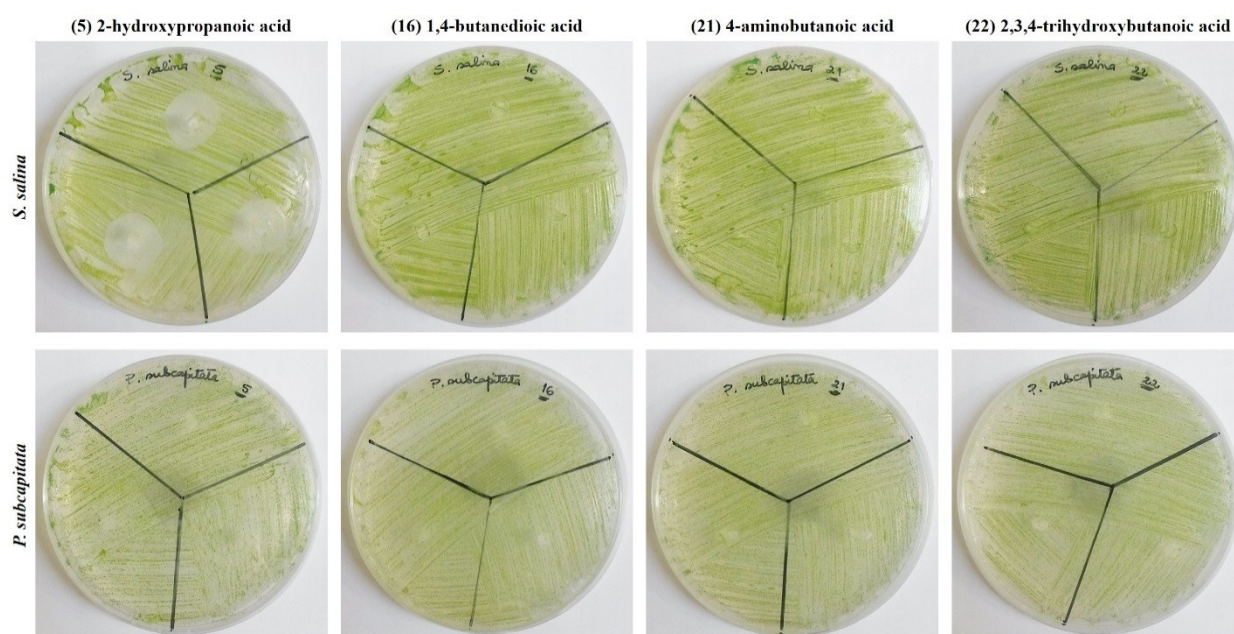

**Figure S5.1.** Photographs of the Petri dishes after application of the disc diffusion method to evaluate the antimicrobial activity of 2-hydroxypropanoic acid (5), 1,4-butanedioic acid (16), 4-aminobutanoic acid (21) and 2,3,4-trihydroxybutanoic acid (22) against *Synechocystis salina* and *Pseudokirchneriella subcapitata*.
